# Supplementary material for: Nanostructured platinum in ordered mesoporous silica as novel efficient catalyst for propane total oxidation
Source: Royal Society of Chemistry journal article supplement (doi:10.1039/c5ra27303j), 2016-01-01
Supplement: c5ra27303j1.pdf [file c5ra27303j1.pdf]

Supplementary Material for

# Nanostructured platinum in ordered mesoporous silica as novel efficient catalyst for propane total oxidation

*Yidan Cao<sup>a</sup>, Rui Ran,<sup>a,\*</sup> Yusheng Chen,<sup>a</sup> Xiaodong Wu<sup>b</sup> and Duan Weng<sup>a,b,\*</sup>*

<sup>a</sup> State Key Laboratory of New Ceramics and Fine Processing, School of Materials Science and Engineering, Tsinghua University, Beijing 100084, China

<sup>b</sup> Key Laboratory of Advanced Materials of Ministry of Education, School of Materials Science and Engineering, Tsinghua University, Beijing 100084, China

\*Corresponding author:

Rui Ran: ranr@tsinghua.edu.cn, Duan Weng: duanweng@tsinghua.edu.cn.

Table S1 Characteristic data of synthesized Pt/Al<sub>2</sub>O<sub>3</sub> catalysts.

| Sample                            | S <sub>BET</sub> (m <sup>2</sup> g <sup>-1</sup> ) |            | Pore volume (cm <sup>3</sup> g <sup>-1</sup> ) |            | Dispersion of Pt <sup>a</sup> (%) | d <sub>Pt</sub> (nm)  |                  | valence of Pt <sup>c</sup> | Pt species on surface <sup>d</sup> (%) |                  |                  |
|-----------------------------------|----------------------------------------------------|------------|------------------------------------------------|------------|-----------------------------------|-----------------------|------------------|----------------------------|----------------------------------------|------------------|------------------|
|                                   | Support                                            | Pt/support | Support                                        | Pt/support |                                   | CO chem. <sup>a</sup> | TEM <sup>b</sup> |                            | Pt <sup>0</sup>                        | Pt <sup>2+</sup> | Pt <sup>4+</sup> |
| Pt/Al <sub>2</sub> O <sub>3</sub> | 150                                                | 143        | 0.528                                          | 0.524      | 79.1                              | 1.5                   | 1.9              | 2.36                       | 11.5                                   | 56.3             | 32.2             |

<sup>a</sup> Dispersion of platinum and d<sub>Pt</sub> were calculated from CO chemisorption; <sup>b</sup> d<sub>Pt</sub> was calculated from TEM analysis; <sup>c</sup> Valence of Pt was calculated from H<sub>2</sub>-titration; <sup>d</sup> Ratios of Pt species were obtained from XPS analysis.

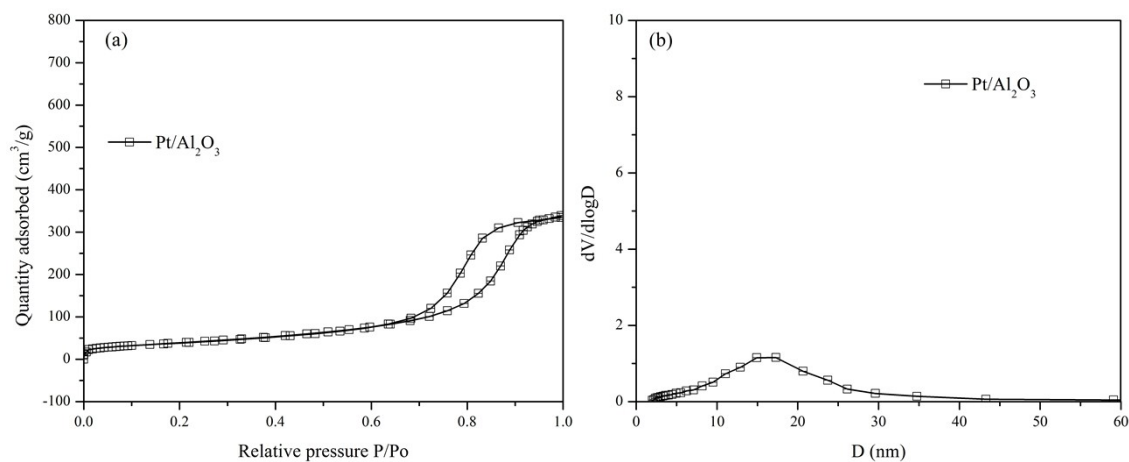

Fig.S1 (a) N<sub>2</sub> adsorption/desorption isotherms and (b) pore size distribution of Pt/Al<sub>2</sub>O<sub>3</sub> catalysts.

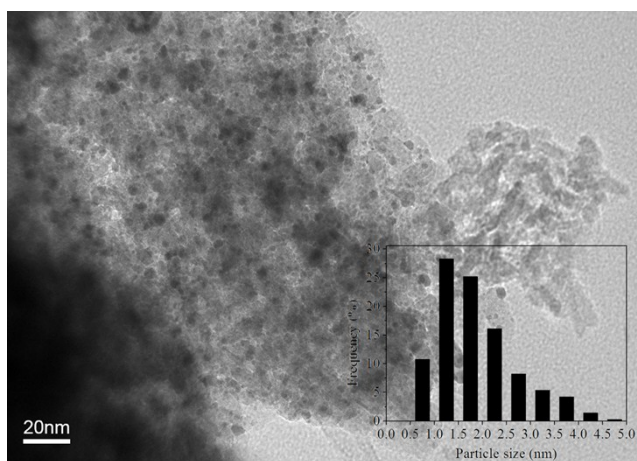

Fig. S2 TEM image of Pt/Al<sub>2</sub>O<sub>3</sub> catalyst. The particle size obtained from TEM image was included in Table S1.

Table S2  $T_{50}$  of propane conversion on the catalysts

| Samples                           | $T_{50}$ of propane conversion ( $^{\circ}$ C) |                       |                       |
|-----------------------------------|------------------------------------------------|-----------------------|-----------------------|
|                                   | 1 <sup>st</sup> round                          | 2 <sup>nd</sup> round | 3 <sup>rd</sup> round |
| Pt/Al <sub>2</sub> O <sub>3</sub> | 351                                            | 331                   | 338                   |
| Pt/SBA-15                         | 334                                            | 317                   | 320                   |
| Pt/KIT-6                          | 266                                            | 245                   | 249                   |
